# Supplementary material for: New platinum and ruthenium Schiff base complexes for water splitting reactions
Source: Royal Society of Chemistry journal article supplement (doi:10.1039/c5dt01055a), 2015-01-01
Supplement: c5dt01055a1.pdf [file c5dt01055a1.pdf]

## Electronic Supplementary Information

### **New platinum and ruthenium Schiff base complexes for water splitting reactions**

Chuanjun Wang,<sup>a</sup> Yong Chen,<sup>a</sup> and Wen-Fu Fu<sup>\*a,b</sup>

<sup>a</sup> *Key Laboratory of Photochemical Conversion and Optoelectronic Materials and HKU-CAS Joint Laboratory on New Materials, Technical Institute of Physics and Chemistry and University of Chinese Academy of Sciences, CAS, Beijing, 100190, People's Republic of China*

<sup>b</sup> *College of Chemistry and Engineering, Yunnan Normal University, Kunming, 650092, People's Republic of China*

*E-mail: [fuwf@mail.ipc.ac.cn](mailto:fuwf@mail.ipc.ac.cn)*

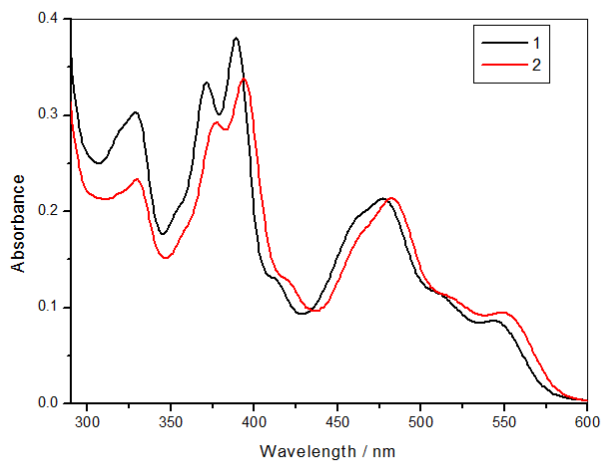

**Figure S1.** UV-vis absorption spectra of complexes **1** and **2** in degassed DMF ( $1.0 \times 10^{-5}$  M) solution at room temperature.

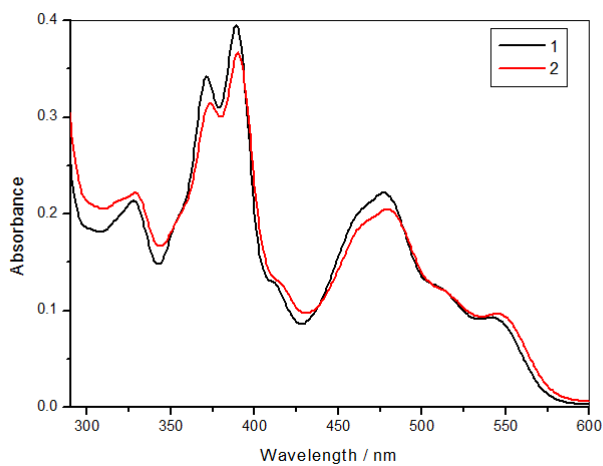

**Figure S2.** UV-vis absorption spectra of complexes **1** and **2** in degassed DMF/H<sub>2</sub>O (9:1) mixed solvents ( $1.0 \times 10^{-5}$  M).

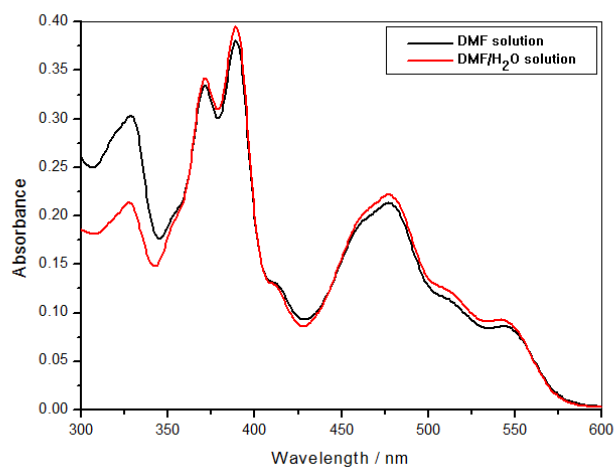

**Figure S3.** UV-vis absorption spectra of complex **1** in DMF and DMF/H<sub>2</sub>O (9:1) mixed solvents ( $1.0 \times 10^{-5}$  M).

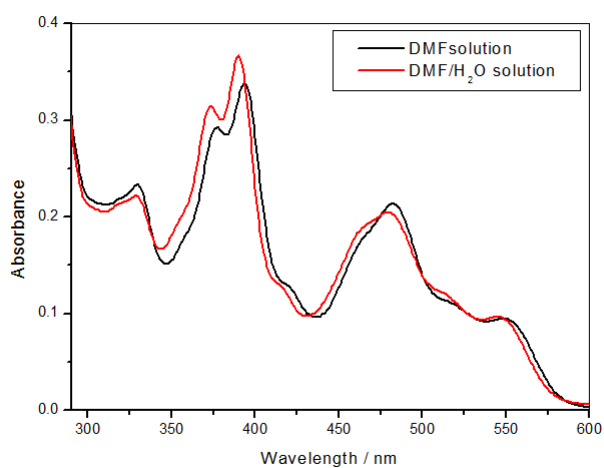

**Figure S4.** UV-vis absorption spectra differences of complex **2** in DMF and DMF/H<sub>2</sub>O (9:1) mixed solvents ( $1.0 \times 10^{-5}$  M).

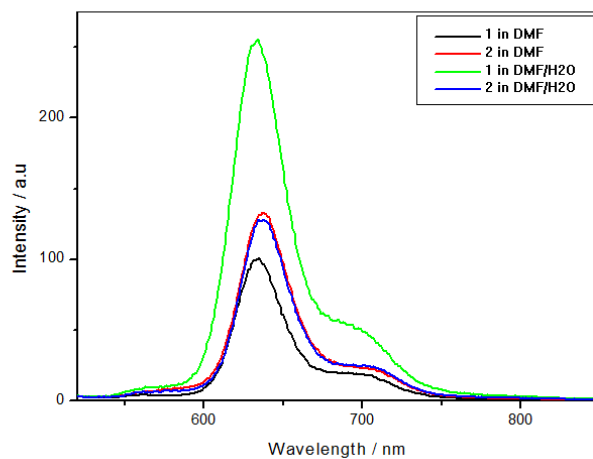

**Figure S5.** Emission spectra of complexes **1** and **2** in air-saturated DMF and DMF/H<sub>2</sub>O (9:1) mixed solution ( $1.0 \times 10^{-5}$  M) at room temperature, excitation upon 480 nm.

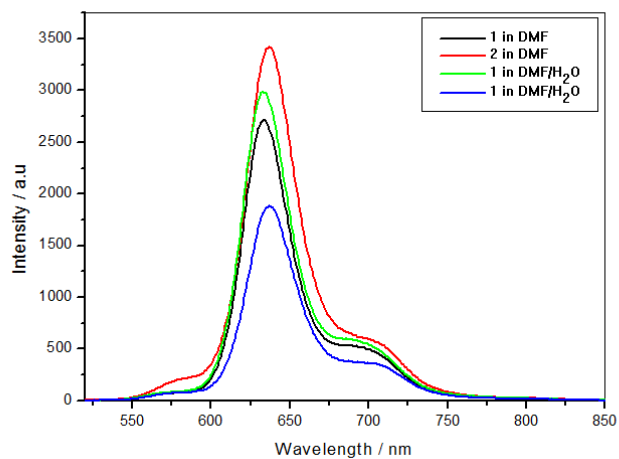

**Figure S6.** Emission spectra of complexes **1** and **2** in degassed DMF and DMF/H<sub>2</sub>O (9:1) mixed solution ( $1.0 \times 10^{-5}$  M) at room temperature, excitation upon 480 nm.

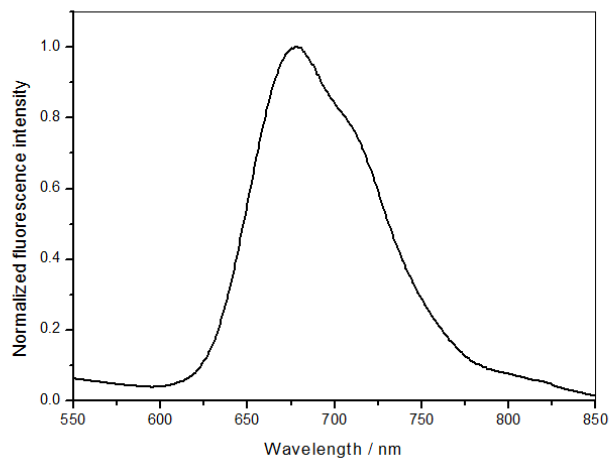

**Figure S7.** Emission spectrum of complex **1** in solid state at room temperature, excitation upon 480 nm.

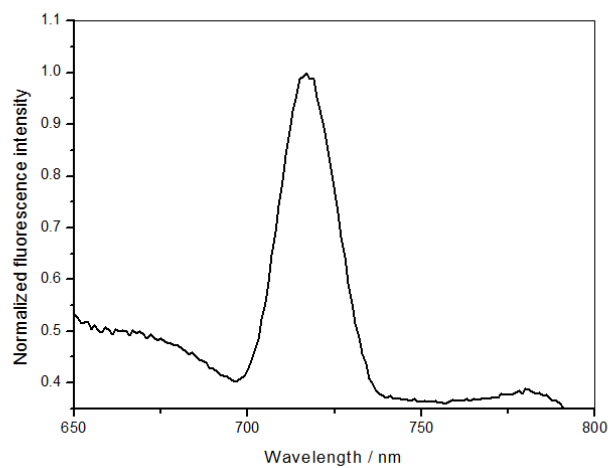

**Figure S8.** Emission spectrum of complex **2** in solid state at room temperature, excitation upon 480 nm.

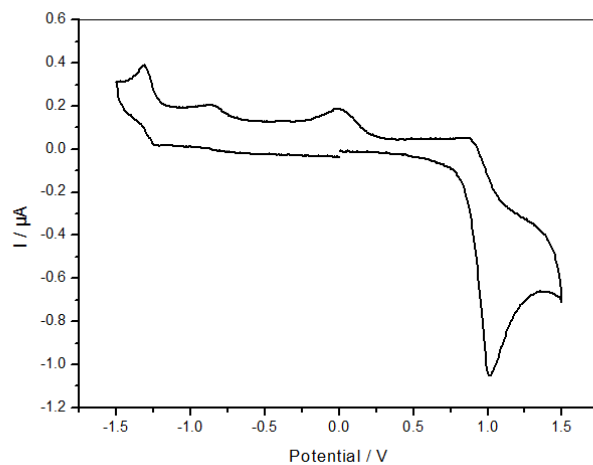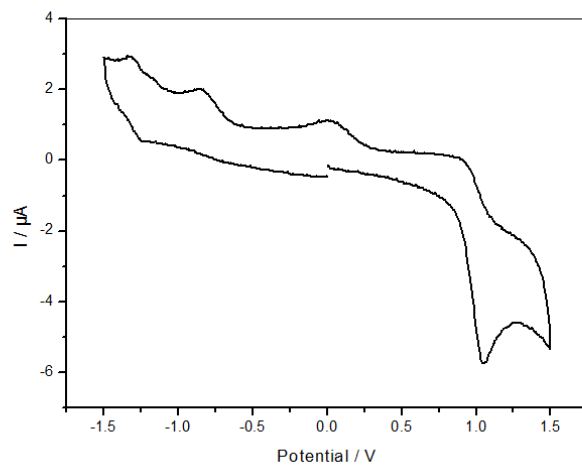

**Figure S9.** Cyclic voltammetric curves of complexes **1** (up) and **2** (down) , sample concentration is  $1.0 \times 10^{-4}$  M in 0.1M n-Bu<sub>4</sub>NPF<sub>6</sub>/DMF, scan rate 100 mV s<sup>-1</sup> at room temperature, working electrode: glassy carbon, counter electrode: Pt foil; reference electrode: saturated calomel electrode (SCE). Potential in V vs. SCE.

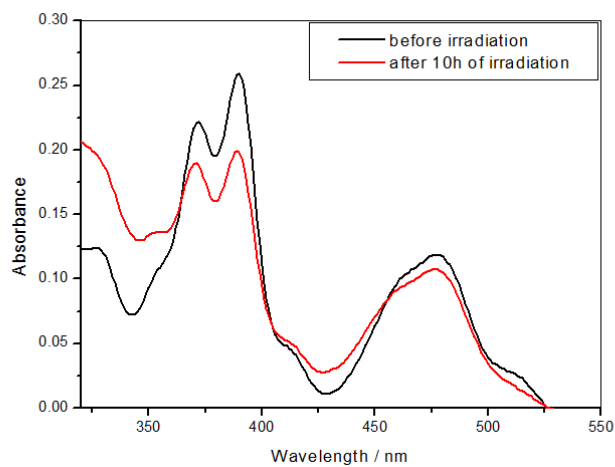

**Figure S10.** Optical absorption spectral changes of complex **1** ( $1.0 \times 10^{-5}$  M) containing  $\text{K}_2\text{PtCl}_4$  aqueous solution ( $3.0 \times 10^{-5}$  M), TEA (0.86 M) before irradiation and after 10 h of irradiation.

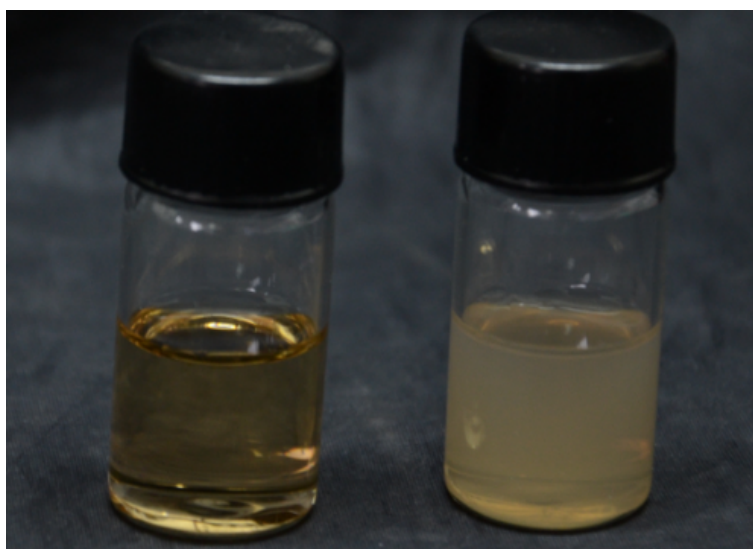

**Figure S11.** Images of the 12 h reaction solutions of complex **2** in the absence (left) and presence(right) of  $\text{TiO}_2$  used for absorbance and fluorescence tests.

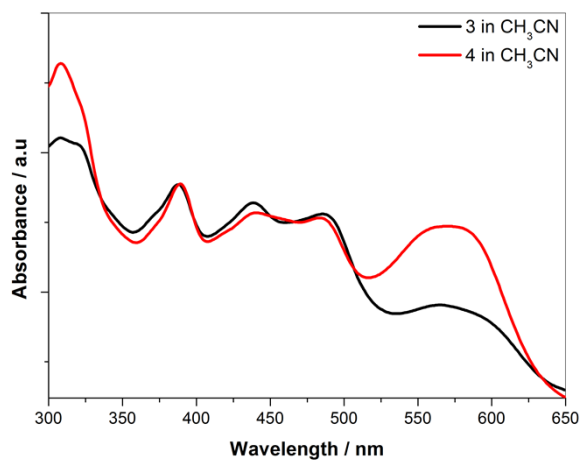

**Figure S12.** UV-vis profiles of complexes **3** and **4** in  $\text{CH}_3\text{CN}$  ( $5.0 \times 10^{-5}$  M).

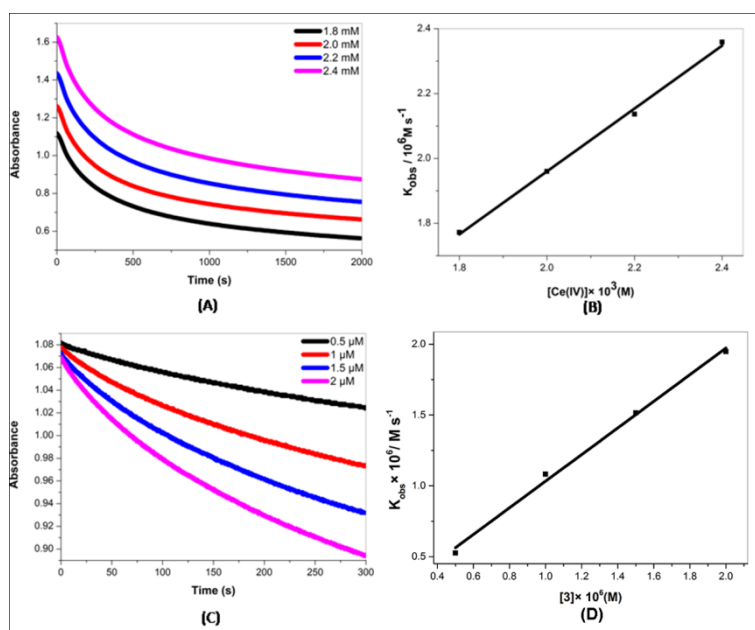

**Figure S13.** (A) Absorption spectral changes of CAN at 360 nm after mixing complex **3** (0.01 mM) with various concentrations of CAN aqueous solution, no data were collected in the first 12 s due to injecting CAN and shaking cell. (B) Plots of initial rate  $k_{\text{obs}}$  calculated by linear fitting the data from 0 to 300 s in the upper portion versus  $[\text{Ce}^{4+}]$ , CAN loss is first order in ACN with a first-order rate constant of  $1.0 \times 10^{-3} \text{ s}^{-1}$ . (C) Monitoring CAN decay at 360 nm after the addition of complex **3** (0.5, 1.0, 1.5, 2.0  $\mu\text{M}$ ). (D) Plots of  $k_{\text{obs}}$  versus  $[\mathbf{3}]$ , the initial rates  $k_{\text{obs}}$  were calculated by linear fitting the data from 0 to 60 s, CAN loss is first order in **3** with a first-order rate constant of  $0.87 \text{ s}^{-1}$ .



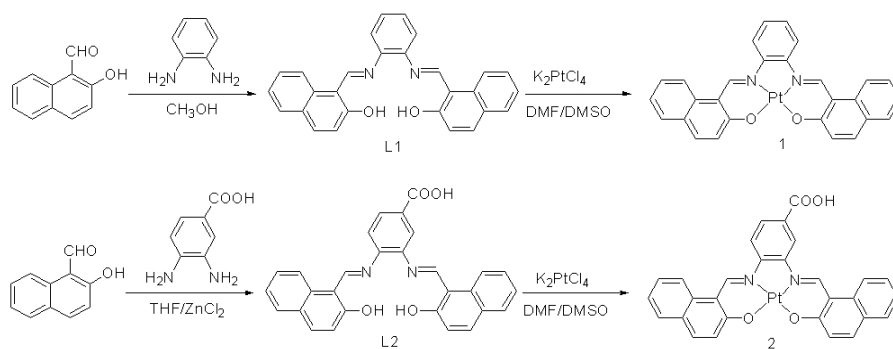

**Figure S14.** Preparation procedures of complex 1 and complex 2.

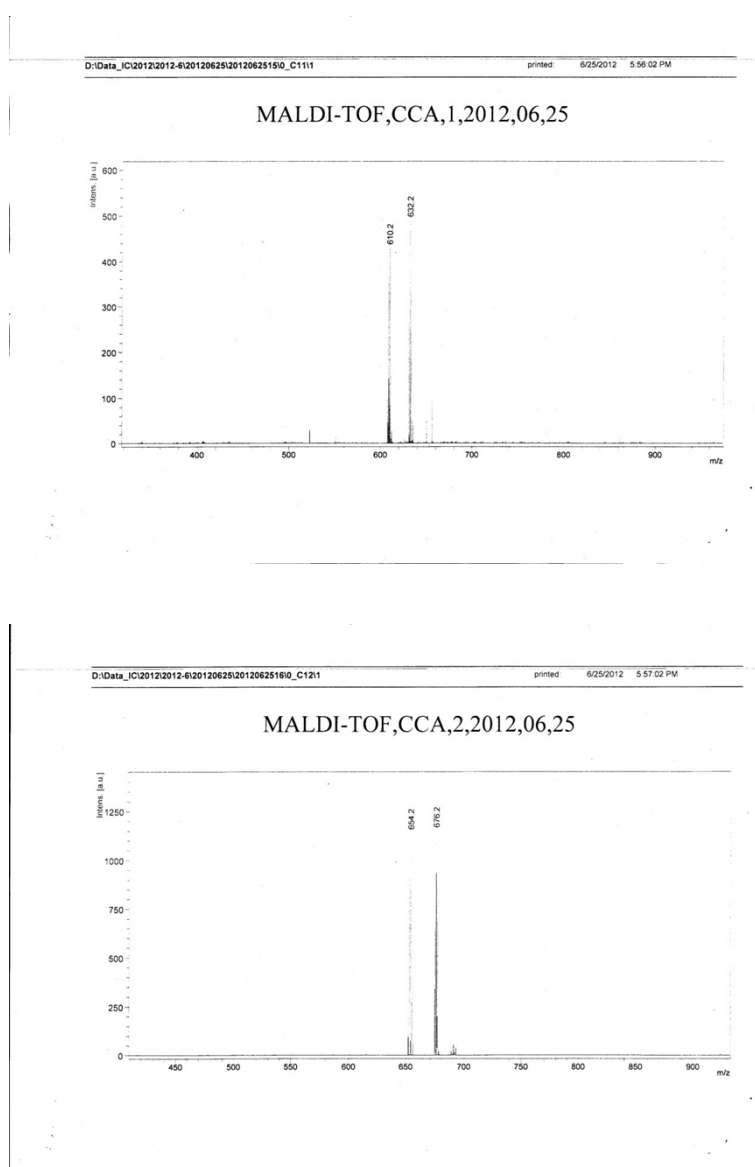

**Figure S15.** MALDI-TOF mass spectrum of complex 1 (up, 610.2  $[M + H]^+$ ; 632.2  $[M + Na]^+$ ) and complex 2 (down, 654.2  $[M + H]^+$ ; 676.2  $[M + Na]^+$ ).

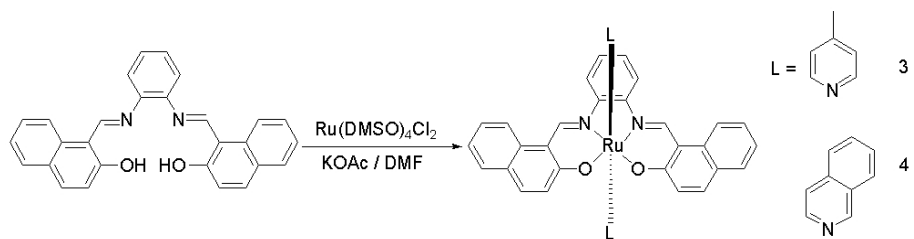

**Figure S16.** Preparation procedure of complexes **3** and **4**.

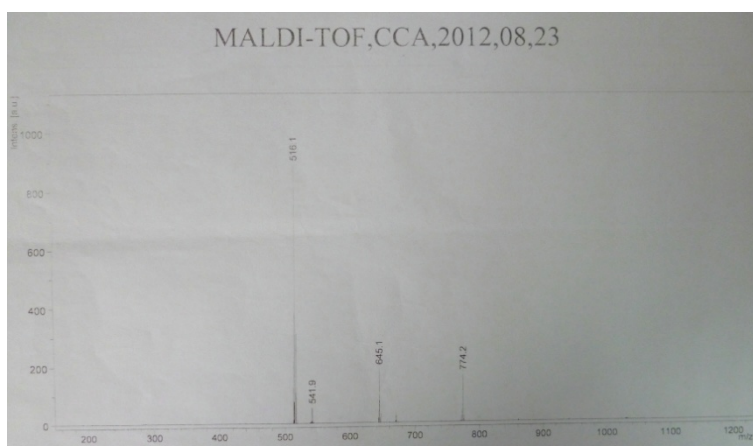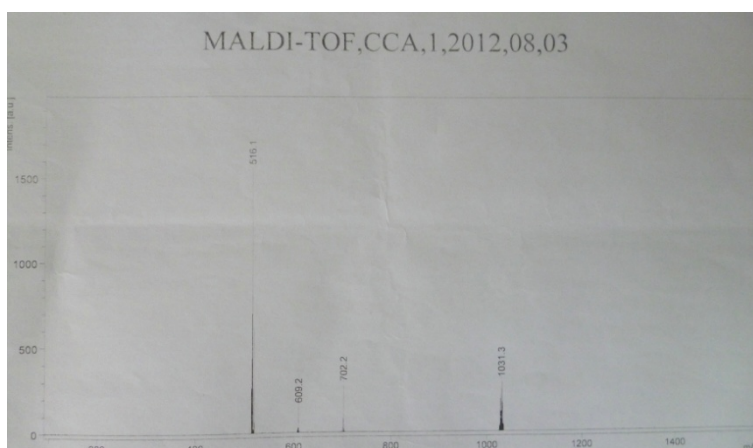

**Figure S17.** MALDI-TOF of complexes **3** (up) and **4** (down).

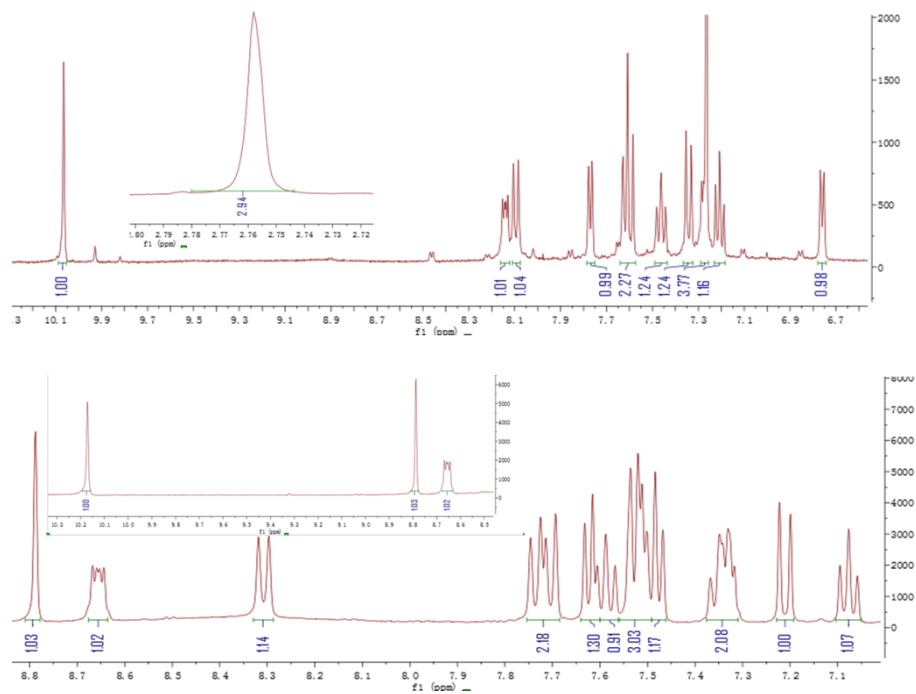

**Figure S18.** <sup>1</sup>H NMR spectra of complexes **3** in CDCl<sub>3</sub> (up) and **4** in d<sup>6</sup>-DMSO (down).

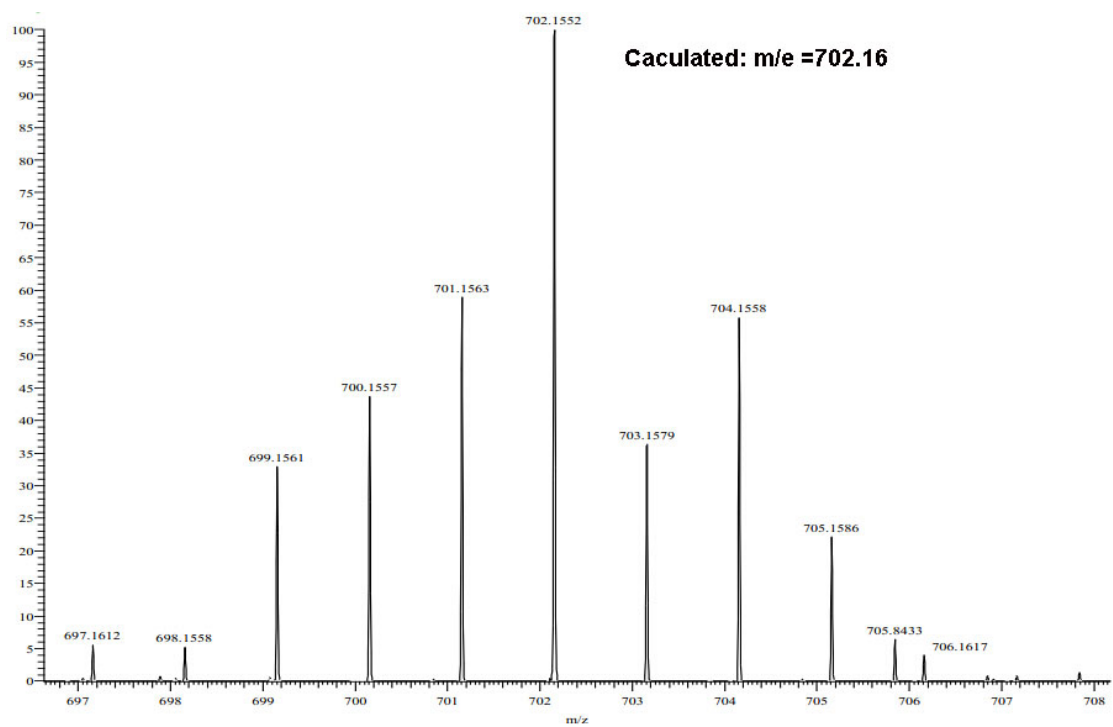

Wangchunjun-2 #15 RT: 0.09 AV: 1 NL: 2.37E8  
T: FTMS + p ESI Full ms [150.00-2000.00]

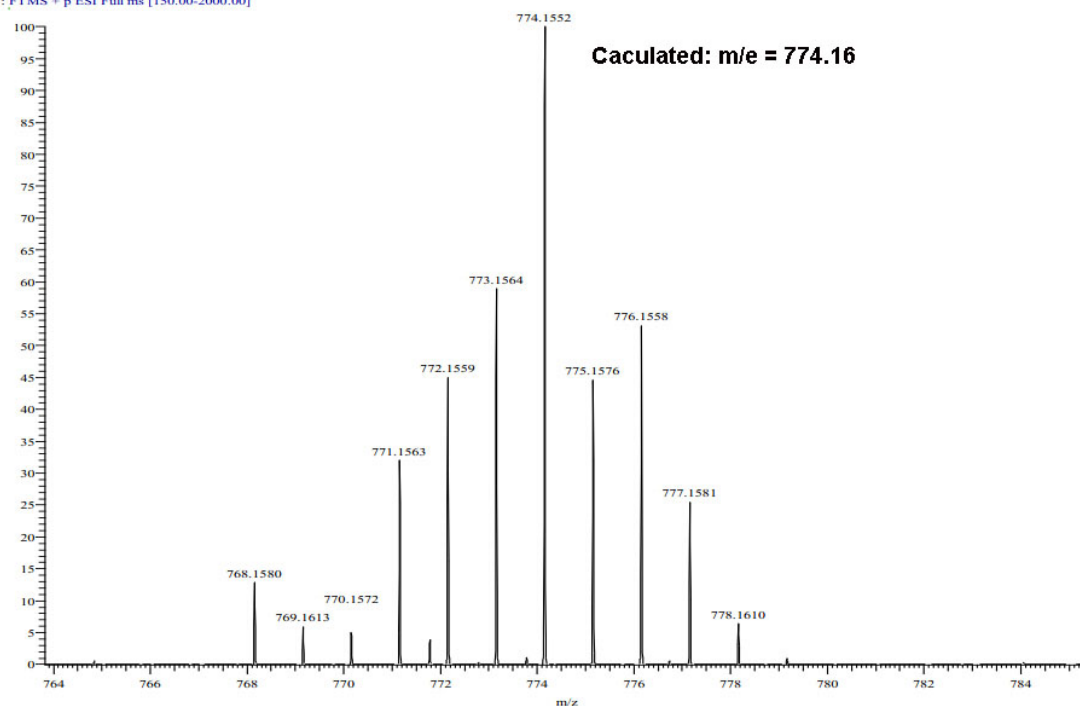

**Figure S19.** HRMS spectra of complexes **3** (up) and **4** (down) in  $\text{CH}_3\text{CN}$  and  $\text{H}_2\text{O}$ .
